# Supplementary material
Source: publisher figshare collection journal article supplement (https://acs.figshare.com/ndownloader/files/5113702)
Supplement: Supplementary file 1 [file 5113702]

#==========================================================================
# MS 

_publ_contact_author_name           'Prof. Ren-Gen Xiong'
_publ_contact_author_address          
;
Prof. Ren-Gen Xiong
Coordination Chemistry Institue
Nanjing University, Nanjing
210093, P. R. China
;
_publ_contact_author_email        'xiongrg@netra.nju.edu.cn'
_publ_contact_author_fax          '86-25-83317761'
_publ_contact_author_phone        '86-25-83594724'
_publ_requested_journal           'Inorg. Chem.'
_publ_section_title
;
Syntheses, Crystal Structures, and Luminescent Properties of Three 
Novel Zinc coordination Polymers with Tetrazolyl Ligands
;
_publ_section_references
;

Allen, F.H., Kennard, O., Watson, D.G., Brammer, L., Orpen, A.G. & Taylor, R.
(1987). Chem. Soc. Perkin Trans. II, S1-S19.
 
Nardelli, M. (1995). J. Appl. Cryst. 28, 659.

Orpen, A.G., Brammer, L., Allen, F.H., Kennard, O., Watson, D.G. & Taylor, R.
(1989). J. Chem. Soc. Dalton Trans., S1-S83.

Siemens (1996). SMART and SAINT. Area Detector Control and Integration
Software. Siemens Analytical X-Ray Systems, Inc., Madison, Wisconsin, USA.

Sheldrick, G. M. (1996). SADABS. Program for Empirical  Absorption
Correction of Area Detector Data, University of G\"ottingen, Germany.

Sheldrick, G.M. (1997).  SHELXTL V5.1 Software Reference Manual, 
Bruker AXS, Inc., Madison, Wisconsin, USA.

Spek, A.L. (1990). Acta Cryst. A46, C-34.

;

_publ_section_exptl_refinement
;
The data collection covered over a hemisphere of reciprocal space by a
combination of three sets of exposures; each set had a different \f angle (0,
88 and 180\%) for the crystal and each exposure of 10s covered 0.3\% in \w.
The crystal-to-detector distance was 4 cm and the detector swing angle was
-35\%. Coverage of the unique set is over 99% complete. Crystal decay was 
monitored by repeating fifty initial frames at the end of data collection 
and analysing the duplicate reflections, and was found  to be negligible.

;

#============================================================================ 
data_1 
 
_audit_creation_method            SHELXL-97 
_chemical_name_systematic 
; 
 ? 
; 
_chemical_name_common             ? 
_chemical_melting_point           ? 
_chemical_formula_moiety          ? 
_chemical_formula_sum 
 'C12 H20 N24 O Zn3' 
_chemical_formula_weight          712.63 
 
loop_ 
 _atom_type_symbol 
 _atom_type_description 
 _atom_type_scat_dispersion_real 
 _atom_type_scat_dispersion_imag 
 _atom_type_scat_source 
 'C'  'C'   0.0033   0.0016 
 'International Tables Vol C Tables 4.2.6.8 and 6.1.1.4' 
 'H'  'H'   0.0000   0.0000 
 'International Tables Vol C Tables 4.2.6.8 and 6.1.1.4' 
 'N'  'N'   0.0061   0.0033 
 'International Tables Vol C Tables 4.2.6.8 and 6.1.1.4' 
 'O'  'O'   0.0106   0.0060 
 'International Tables Vol C Tables 4.2.6.8 and 6.1.1.4' 
 'Zn'  'Zn'   0.2839   1.4301 
 'International Tables Vol C Tables 4.2.6.8 and 6.1.1.4' 
 
_symmetry_cell_setting            ? 
_symmetry_space_group_name_H-M    ? 
 
loop_ 
 _symmetry_equiv_pos_as_xyz 
 'x, y, z' 
 '-x+3/4, -y+1/4, z+1/2' 
 '-x+1/4, y+1/2, -z+3/4' 
 'x+1/2, -y+3/4, -z+1/4' 
 'z, x, y' 
 'z+1/2, -x+3/4, -y+1/4' 
 '-z+3/4, -x+1/4, y+1/2' 
 '-z+1/4, x+1/2, -y+3/4' 
 'y, z, x' 
 '-y+1/4, z+1/2, -x+3/4' 
 'y+1/2, -z+3/4, -x+1/4' 
 '-y+3/4, -z+1/4, x+1/2' 
 'y+3/4, x+1/4, -z+1/2' 
 '-y, -x, -z' 
 'y+1/4, -x+1/2, z+3/4' 
 '-y+1/2, x+3/4, z+1/4' 
 'x+3/4, z+1/4, -y+1/2' 
 '-x+1/2, z+3/4, y+1/4' 
 '-x, -z, -y' 
 'x+1/4, -z+1/2, y+3/4' 
 'z+3/4, y+1/4, -x+1/2' 
 'z+1/4, -y+1/2, x+3/4' 
 '-z+1/2, y+3/4, x+1/4' 
 '-z, -y, -x' 
 'x, y+1/2, z+1/2' 
 '-x+3/4, -y+3/4, z+1' 
 '-x+1/4, y+1, -z+5/4' 
 'x+1/2, -y+5/4, -z+3/4' 
 'z, x+1/2, y+1/2' 
 'z+1/2, -x+5/4, -y+3/4' 
 '-z+3/4, -x+3/4, y+1' 
 '-z+1/4, x+1, -y+5/4' 
 'y, z+1/2, x+1/2' 
 '-y+1/4, z+1, -x+5/4' 
 'y+1/2, -z+5/4, -x+3/4' 
 '-y+3/4, -z+3/4, x+1' 
 'y+3/4, x+3/4, -z+1' 
 '-y, -x+1/2, -z+1/2' 
 'y+1/4, -x+1, z+5/4' 
 '-y+1/2, x+5/4, z+3/4' 
 'x+3/4, z+3/4, -y+1' 
 '-x+1/2, z+5/4, y+3/4' 
 '-x, -z+1/2, -y+1/2' 
 'x+1/4, -z+1, y+5/4' 
 'z+3/4, y+3/4, -x+1' 
 'z+1/4, -y+1, x+5/4' 
 '-z+1/2, y+5/4, x+3/4' 
 '-z, -y+1/2, -x+1/2' 
 'x+1/2, y, z+1/2' 
 '-x+5/4, -y+1/4, z+1' 
 '-x+3/4, y+1/2, -z+5/4' 
 'x+1, -y+3/4, -z+3/4' 
 'z+1/2, x, y+1/2' 
 'z+1, -x+3/4, -y+3/4' 
 '-z+5/4, -x+1/4, y+1' 
 '-z+3/4, x+1/2, -y+5/4' 
 'y+1/2, z, x+1/2' 
 '-y+3/4, z+1/2, -x+5/4' 
 'y+1, -z+3/4, -x+3/4' 
 '-y+5/4, -z+1/4, x+1' 
 'y+5/4, x+1/4, -z+1' 
 '-y+1/2, -x, -z+1/2' 
 'y+3/4, -x+1/2, z+5/4' 
 '-y+1, x+3/4, z+3/4' 
 'x+5/4, z+1/4, -y+1' 
 '-x+1, z+3/4, y+3/4' 
 '-x+1/2, -z, -y+1/2' 
 'x+3/4, -z+1/2, y+5/4' 
 'z+5/4, y+1/4, -x+1' 
 'z+3/4, -y+1/2, x+5/4' 
 '-z+1, y+3/4, x+3/4' 
 '-z+1/2, -y, -x+1/2' 
 'x+1/2, y+1/2, z' 
 '-x+5/4, -y+3/4, z+1/2' 
 '-x+3/4, y+1, -z+3/4' 
 'x+1, -y+5/4, -z+1/4' 
 'z+1/2, x+1/2, y' 
 'z+1, -x+5/4, -y+1/4' 
 '-z+5/4, -x+3/4, y+1/2' 
 '-z+3/4, x+1, -y+3/4' 
 'y+1/2, z+1/2, x' 
 '-y+3/4, z+1, -x+3/4' 
 'y+1, -z+5/4, -x+1/4' 
 '-y+5/4, -z+3/4, x+1/2' 
 'y+5/4, x+3/4, -z+1/2' 
 '-y+1/2, -x+1/2, -z' 
 'y+3/4, -x+1, z+3/4' 
 '-y+1, x+5/4, z+1/4' 
 'x+5/4, z+3/4, -y+1/2' 
 '-x+1, z+5/4, y+1/4' 
 '-x+1/2, -z+1/2, -y' 
 'x+3/4, -z+1, y+3/4' 
 'z+5/4, y+3/4, -x+1/2' 
 'z+3/4, -y+1, x+3/4' 
 '-z+1, y+5/4, x+1/4' 
 '-z+1/2, -y+1/2, -x' 
 '-x, -y, -z' 
 'x-3/4, y-1/4, -z-1/2' 
 'x-1/4, -y-1/2, z-3/4' 
 '-x-1/2, y-3/4, z-1/4' 
 '-z, -x, -y' 
 '-z-1/2, x-3/4, y-1/4' 
 'z-3/4, x-1/4, -y-1/2' 
 'z-1/4, -x-1/2, y-3/4' 
 '-y, -z, -x' 
 'y-1/4, -z-1/2, x-3/4' 
 '-y-1/2, z-3/4, x-1/4' 
 'y-3/4, z-1/4, -x-1/2' 
 '-y-3/4, -x-1/4, z-1/2' 
 'y, x, z' 
 '-y-1/4, x-1/2, -z-3/4' 
 'y-1/2, -x-3/4, -z-1/4' 
 '-x-3/4, -z-1/4, y-1/2' 
 'x-1/2, -z-3/4, -y-1/4' 
 'x, z, y' 
 '-x-1/4, z-1/2, -y-3/4' 
 '-z-3/4, -y-1/4, x-1/2' 
 '-z-1/4, y-1/2, -x-3/4' 
 'z-1/2, -y-3/4, -x-1/4' 
 'z, y, x' 
 '-x, -y+1/2, -z+1/2' 
 'x-3/4, y+1/4, -z' 
 'x-1/4, -y, z-1/4' 
 '-x-1/2, y-1/4, z+1/4' 
 '-z, -x+1/2, -y+1/2' 
 '-z-1/2, x-1/4, y+1/4' 
 'z-3/4, x+1/4, -y' 
 'z-1/4, -x, y-1/4' 
 '-y, -z+1/2, -x+1/2' 
 'y-1/4, -z, x-1/4' 
 '-y-1/2, z-1/4, x+1/4' 
 'y-3/4, z+1/4, -x' 
 '-y-3/4, -x+1/4, z' 
 'y, x+1/2, z+1/2' 
 '-y-1/4, x, -z-1/4' 
 'y-1/2, -x-1/4, -z+1/4' 
 '-x-3/4, -z+1/4, y' 
 'x-1/2, -z-1/4, -y+1/4' 
 'x, z+1/2, y+1/2' 
 '-x-1/4, z, -y-1/4' 
 '-z-3/4, -y+1/4, x' 
 '-z-1/4, y, -x-1/4' 
 'z-1/2, -y-1/4, -x+1/4' 
 'z, y+1/2, x+1/2' 
 '-x+1/2, -y, -z+1/2' 
 'x-1/4, y-1/4, -z' 
 'x+1/4, -y-1/2, z-1/4' 
 '-x, y-3/4, z+1/4' 
 '-z+1/2, -x, -y+1/2' 
 '-z, x-3/4, y+1/4' 
 'z-1/4, x-1/4, -y' 
 'z+1/4, -x-1/2, y-1/4' 
 '-y+1/2, -z, -x+1/2' 
 'y+1/4, -z-1/2, x-1/4' 
 '-y, z-3/4, x+1/4' 
 'y-1/4, z-1/4, -x' 
 '-y-1/4, -x-1/4, z' 
 'y+1/2, x, z+1/2' 
 '-y+1/4, x-1/2, -z-1/4' 
 'y, -x-3/4, -z+1/4' 
 '-x-1/4, -z-1/4, y' 
 'x, -z-3/4, -y+1/4' 
 'x+1/2, z, y+1/2' 
 '-x+1/4, z-1/2, -y-1/4' 
 '-z-1/4, -y-1/4, x' 
 '-z+1/4, y-1/2, -x-1/4' 
 'z, -y-3/4, -x+1/4' 
 'z+1/2, y, x+1/2' 
 '-x+1/2, -y+1/2, -z' 
 'x-1/4, y+1/4, -z-1/2' 
 'x+1/4, -y, z-3/4' 
 '-x, y-1/4, z-1/4' 
 '-z+1/2, -x+1/2, -y' 
 '-z, x-1/4, y-1/4' 
 'z-1/4, x+1/4, -y-1/2' 
 'z+1/4, -x, y-3/4' 
 '-y+1/2, -z+1/2, -x' 
 'y+1/4, -z, x-3/4' 
 '-y, z-1/4, x-1/4' 
 'y-1/4, z+1/4, -x-1/2' 
 '-y-1/4, -x+1/4, z-1/2' 
 'y+1/2, x+1/2, z' 
 '-y+1/4, x, -z-3/4' 
 'y, -x-1/4, -z-1/4' 
 '-x-1/4, -z+1/4, y-1/2' 
 'x, -z-1/4, -y-1/4' 
 'x+1/2, z+1/2, y' 
 '-x+1/4, z, -y-3/4' 
 '-z-1/4, -y+1/4, x-1/2' 
 '-z+1/4, y, -x-3/4' 
 'z, -y-1/4, -x-1/4' 
 'z+1/2, y+1/2, x' 
 
_cell_length_a                    17.6019(12) 
_cell_length_b                    17.6019(12) 
_cell_length_c                    17.6019(12) 
_cell_angle_alpha                 90.00 
_cell_angle_beta                  90.00 
_cell_angle_gamma                 90.00 
_cell_volume                      5453.5(6) 
_cell_formula_units_Z             8 
_cell_measurement_temperature     293(2) 
_cell_measurement_reflns_used     ? 
_cell_measurement_theta_min       ? 
_cell_measurement_theta_max       ? 
 
_exptl_crystal_description        ? 
_exptl_crystal_colour             ? 
_exptl_crystal_size_max           ? 
_exptl_crystal_size_mid           ? 
_exptl_crystal_size_min           ? 
_exptl_crystal_density_meas       ? 
_exptl_crystal_density_diffrn     1.736 
_exptl_crystal_density_method     'not measured' 
_exptl_crystal_F_000              2864 
_exptl_absorpt_coefficient_mu     2.675 
_exptl_absorpt_correction_type    ? 
_exptl_absorpt_correction_T_min   ? 
_exptl_absorpt_correction_T_max   ? 
_exptl_absorpt_process_details    ? 
 
_exptl_special_details 
; 
 ? 
; 
 
_diffrn_ambient_temperature       293(2) 
_diffrn_radiation_wavelength      0.71073 
_diffrn_radiation_type            MoK\a 
_diffrn_radiation_source          'fine-focus sealed tube' 
_diffrn_radiation_monochromator   graphite 
_diffrn_measurement_device_type   ? 
_diffrn_measurement_method        ? 
_diffrn_detector_area_resol_mean  ? 
_diffrn_standards_number          ? 
_diffrn_standards_interval_count  ? 
_diffrn_standards_interval_time   ? 
_diffrn_standards_decay_%         ? 
_diffrn_reflns_number             7402 
_diffrn_reflns_av_R_equivalents   0.1091 
_diffrn_reflns_av_sigmaI/netI     0.0477 
_diffrn_reflns_limit_h_min        -15 
_diffrn_reflns_limit_h_max        22 
_diffrn_reflns_limit_k_min        -23 
_diffrn_reflns_limit_k_max        23 
_diffrn_reflns_limit_l_min        -22 
_diffrn_reflns_limit_l_max        20 
_diffrn_reflns_theta_min          2.00 
_diffrn_reflns_theta_max          28.20 
_reflns_number_total              367 
_reflns_number_gt                 302 
_reflns_threshold_expression      >2sigma(I) 
 
_computing_data_collection        ? 
_computing_cell_refinement        ? 
_computing_data_reduction         ? 
_computing_structure_solution     'SHELXS-97 (Sheldrick, 1990)' 
_computing_structure_refinement   'SHELXL-97 (Sheldrick, 1997)' 
_computing_molecular_graphics     ? 
_computing_publication_material   ? 
 
_refine_special_details 
; 
 Refinement of F^2^ against ALL reflections.  The weighted R-factor wR and 
 goodness of fit S are based on F^2^, conventional R-factors R are based 
 on F, with F set to zero for negative F^2^. The threshold expression of 
 F^2^ > 2sigma(F^2^) is used only for calculating R-factors(gt) etc. and is 
 not relevant to the choice of reflections for refinement.  R-factors based 
 on F^2^ are statistically about twice as large as those based on F, and R- 
 factors based on ALL data will be even larger. 
; 
 
_refine_ls_structure_factor_coef  Fsqd  
_refine_ls_matrix_type            full 
_refine_ls_weighting_scheme       calc  
_refine_ls_weighting_details 
 'calc w=1/[\s^2^(Fo^2^)+(0.1000P)^2^+0.0000P] where P=(Fo^2^+2Fc^2^)/3' 
_atom_sites_solution_primary      direct 
_atom_sites_solution_secondary    difmap 
_atom_sites_solution_hydrogens    geom 
_refine_ls_hydrogen_treatment     mixed 
_refine_ls_extinction_method      none 
_refine_ls_extinction_coef        ? 
_refine_ls_number_reflns          367 
_refine_ls_number_parameters      36 
_refine_ls_number_restraints      0 
_refine_ls_R_factor_all           0.0692 
_refine_ls_R_factor_gt            0.0425 
_refine_ls_wR_factor_ref          0.1282 
_refine_ls_wR_factor_gt           0.1110 
_refine_ls_goodness_of_fit_ref    0.921 
_refine_ls_restrained_S_all       0.921 
_refine_ls_shift/su_max           0.360 
_refine_ls_shift/su_mean          0.010 
 
loop_ 
 _atom_site_label 
 _atom_site_type_symbol 
 _atom_site_fract_x 
 _atom_site_fract_y 
 _atom_site_fract_z 
 _atom_site_U_iso_or_equiv 
 _atom_site_adp_type 
 _atom_site_occupancy 
 _atom_site_symmetry_multiplicity 
 _atom_site_calc_flag 
 _atom_site_refinement_flags 
 _atom_site_disorder_assembly 
 _atom_site_disorder_group 
Zn1 Zn 0.6250 0.1250 0.1250 0.0170(5) Uani 1 24 d S . . 
Zn2 Zn 0.5000 0.2500 0.2500 0.0262(5) Uani 1 12 d S . . 
N2 N 0.5021(3) 0.1250 0.1250 0.0230(12) Uani 1 4 d S . . 
N1 N 0.4584(2) 0.16810(15) 0.16810(15) 0.0296(10) Uani 1 2 d S . . 
C3 C 0.3871(3) 0.1520(2) 0.1520(2) 0.0456(13) Uani 0.50 2 d SP . . 
N3 N 0.3871(3) 0.1520(2) 0.1520(2) 0.0456(13) Uani 0.50 2 d SP . . 
C2 C 0.3117(7) 0.1763(6) 0.1763(6) 0.086(8) Uani 0.50 2 d SP . . 
O1W O 0.1250 0.1250 0.1250 0.173(14) Uiso 1 24 d S . . 
H2C H 0.2389(15) 0.146(2) 0.2389(15) 0.000(9) Uiso 1 2 d S . . 
H2B H 0.27(2) 0.20(2) 0.20(2) 0.6(4) Uiso 1 2 d S . . 
H2A H 0.317(16) 0.161(10) 0.161(10) 0.32(16) Uiso 1 2 d S . . 
 
loop_ 
 _atom_site_aniso_label 
 _atom_site_aniso_U_11 
 _atom_site_aniso_U_22 
 _atom_site_aniso_U_33 
 _atom_site_aniso_U_23 
 _atom_site_aniso_U_13 
 _atom_site_aniso_U_12 
Zn1 0.0170(5) 0.0170(5) 0.0170(5) 0.000 0.000 0.000 
Zn2 0.0262(5) 0.0262(5) 0.0262(5) -0.0056(3) 0.0056(3) 0.0056(3) 
N2 0.022(3) 0.0237(17) 0.0237(17) -0.007(2) 0.000 0.000 
N1 0.024(2) 0.0326(15) 0.0326(15) -0.0089(18) 0.0041(12) 0.0041(12) 
C3 0.016(2) 0.060(2) 0.060(2) -0.008(3) 0.0030(14) 0.0030(14) 
N3 0.016(2) 0.060(2) 0.060(2) -0.008(3) 0.0030(14) 0.0030(14) 
C2 0.013(5) 0.123(12) 0.123(12) -0.084(13) 0.003(4) 0.003(4) 
 
_geom_special_details 
; 
 All esds (except the esd in the dihedral angle between two l.s. planes) 
 are estimated using the full covariance matrix.  The cell esds are taken 
 into account individually in the estimation of esds in distances, angles 
 and torsion angles; correlations between esds in cell parameters are only 
 used when they are defined by crystal symmetry.  An approximate (isotropic) 
 treatment of cell esds is used for estimating esds involving l.s. planes. 
; 
 
loop_ 
 _geom_bond_atom_site_label_1 
 _geom_bond_atom_site_label_2 
 _geom_bond_distance 
 _geom_bond_site_symmetry_2 
 _geom_bond_publ_flag 
Zn1 N2 2.163(5) 82_545 ? 
Zn1 N2 2.163(5) . ? 
Zn1 N2 2.163(5) 50_554 ? 
Zn1 N2 2.163(5) 77_545 ? 
Zn1 N2 2.163(5) 6 ? 
Zn1 N2 2.163(5) 57_554 ? 
Zn2 N1 2.166(4) 121_655 ? 
Zn2 N1 2.166(4) . ? 
Zn2 N1 2.166(4) 154_565 ? 
Zn2 N1 2.166(4) 31_554 ? 
Zn2 N1 2.166(4) 103_656 ? 
Zn2 N1 2.166(4) 82_545 ? 
N2 N1 1.320(5) 76_445 ? 
N2 N1 1.320(5) . ? 
N1 C3 1.318(6) . ? 
C3 N3 1.345(11) 76_445 ? 
C3 C3 1.345(11) 76_445 ? 
C3 C2 1.458(14) . ? 
C3 H2A 1.2(3) . ? 
C2 H2B 0.9(4) . ? 
C2 H2A 0.4(3) . ? 
 
loop_ 
 _geom_angle_atom_site_label_1 
 _geom_angle_atom_site_label_2 
 _geom_angle_atom_site_label_3 
 _geom_angle 
 _geom_angle_site_symmetry_1 
 _geom_angle_site_symmetry_3 
 _geom_angle_publ_flag 
N2 Zn1 N2 90.0 82_545 . ? 
N2 Zn1 N2 90.0 82_545 50_554 ? 
N2 Zn1 N2 180.0 . 50_554 ? 
N2 Zn1 N2 90.0 82_545 77_545 ? 
N2 Zn1 N2 90.0 . 77_545 ? 
N2 Zn1 N2 90.0 50_554 77_545 ? 
N2 Zn1 N2 90.0 82_545 6 ? 
N2 Zn1 N2 90.0 . 6 ? 
N2 Zn1 N2 90.0 50_554 6 ? 
N2 Zn1 N2 180.0 77_545 6 ? 
N2 Zn1 N2 180.0 82_545 57_554 ? 
N2 Zn1 N2 90.0 . 57_554 ? 
N2 Zn1 N2 90.0 50_554 57_554 ? 
N2 Zn1 N2 90.0 77_545 57_554 ? 
N2 Zn1 N2 90.0 6 57_554 ? 
N1 Zn2 N1 180.00(11) 121_655 . ? 
N1 Zn2 N1 90.40(14) 121_655 154_565 ? 
N1 Zn2 N1 89.60(14) . 154_565 ? 
N1 Zn2 N1 89.60(14) 121_655 31_554 ? 
N1 Zn2 N1 90.40(14) . 31_554 ? 
N1 Zn2 N1 89.60(14) 154_565 31_554 ? 
N1 Zn2 N1 90.40(14) 121_655 103_656 ? 
N1 Zn2 N1 89.60(14) . 103_656 ? 
N1 Zn2 N1 90.40(14) 154_565 103_656 ? 
N1 Zn2 N1 180.00(19) 31_554 103_656 ? 
N1 Zn2 N1 89.60(14) 121_655 82_545 ? 
N1 Zn2 N1 90.40(14) . 82_545 ? 
N1 Zn2 N1 180.00(19) 154_565 82_545 ? 
N1 Zn2 N1 90.40(14) 31_554 82_545 ? 
N1 Zn2 N1 89.60(14) 103_656 82_545 ? 
N1 N2 N1 108.7(5) 76_445 . ? 
N1 N2 Zn1 125.7(2) 76_445 . ? 
N1 N2 Zn1 125.7(2) . . ? 
C3 N1 N2 108.0(4) . . ? 
C3 N1 Zn2 127.4(3) . . ? 
N2 N1 Zn2 124.6(3) . . ? 
N1 C3 N3 107.7(3) . 76_445 ? 
N1 C3 C3 107.7(3) . 76_445 ? 
N3 C3 C3 0.0(6) 76_445 76_445 ? 
N1 C3 C2 137.9(8) . . ? 
N3 C3 C2 114.4(7) 76_445 . ? 
C3 C3 C2 114.4(7) 76_445 . ? 
N1 C3 H2A 152(10) . . ? 
N3 C3 H2A 100(10) 76_445 . ? 
C3 C3 H2A 100(10) 76_445 . ? 
C2 C3 H2A 14(10) . . ? 
C3 C2 H2B 169(10) . . ? 
C3 C2 H2A 51(10) . . ? 
H2B C2 H2A 140(10) . . ? 
 
_diffrn_measured_fraction_theta_max    1.000 
_diffrn_reflns_theta_full              28.20 
_diffrn_measured_fraction_theta_full   1.000 
_refine_diff_density_max    1.099 
_refine_diff_density_min   -0.545 
_refine_diff_density_rms    0.084 
#================================================
  
data_2 
  
_audit_creation_method            SHELXL-97 
_chemical_name_systematic 
; 
 ? 
; 
_chemical_name_common             ? 
_chemical_melting_point           ? 
_chemical_formula_moiety          ? 
_chemical_formula_sum 
 'C2 H2 N8 Zn' 
_chemical_formula_weight          203.49 
  
loop_ 
 _atom_type_symbol 
 _atom_type_description 
 _atom_type_scat_dispersion_real 
 _atom_type_scat_dispersion_imag 
 _atom_type_scat_source 
 'C'  'C'   0.0033   0.0016 
 'International Tables Vol C Tables 4.2.6.8 and 6.1.1.4' 
 'H'  'H'   0.0000   0.0000 
 'International Tables Vol C Tables 4.2.6.8 and 6.1.1.4' 
 'N'  'N'   0.0061   0.0033 
 'International Tables Vol C Tables 4.2.6.8 and 6.1.1.4' 
 'Zn'  'Zn'   0.2839   1.4301 
 'International Tables Vol C Tables 4.2.6.8 and 6.1.1.4' 
  
_symmetry_cell_setting            Orthorhombic 
_symmetry_space_group_name_H-M    Pbca 
  
loop_ 
 _symmetry_equiv_pos_as_xyz 
 'x, y, z' 
 '-x+1/2, -y, z+1/2' 
 '-x, y+1/2, -z+1/2' 
 'x+1/2, -y+1/2, -z' 
 '-x, -y, -z' 
 'x-1/2, y, -z-1/2' 
 'x, -y-1/2, z-1/2' 
 '-x-1/2, y-1/2, z' 
  
_cell_length_a                    9.885(2) 
_cell_length_b                    9.536(2) 
_cell_length_c                    13.724(3) 
_cell_angle_alpha                 90.00 
_cell_angle_beta                  90.00 
_cell_angle_gamma                 90.00 
_cell_volume                      1293.8(5) 
_cell_formula_units_Z             8 
_cell_measurement_temperature     293(2) 
_cell_measurement_reflns_used     ? 
_cell_measurement_theta_min       ? 
_cell_measurement_theta_max       ? 
  
_exptl_crystal_description        ? 
_exptl_crystal_colour             ? 
_exptl_crystal_size_max           ? 
_exptl_crystal_size_mid           ? 
_exptl_crystal_size_min           ? 
_exptl_crystal_density_meas       ? 
_exptl_crystal_density_diffrn     2.089 
_exptl_crystal_density_method     'not measured' 
_exptl_crystal_F_000              800 
_exptl_absorpt_coefficient_mu     3.735 
_exptl_absorpt_correction_type    none 
_exptl_absorpt_correction_T_min   ? 
_exptl_absorpt_correction_T_max   ? 
_exptl_absorpt_process_details    ? 
  
_exptl_special_details 
; 
 ? 
; 
  
_diffrn_ambient_temperature       293(2) 
_diffrn_radiation_wavelength      0.71073 
_diffrn_radiation_type            MoK\a 
_diffrn_radiation_source          'fine-focus sealed tube' 
_diffrn_radiation_monochromator   graphite 
_diffrn_measurement_device_type   'CCD area detector' 
_diffrn_measurement_method        'phi and omega scans' 
_diffrn_detector_area_resol_mean  ? 
_diffrn_standards_number          ? 
_diffrn_standards_interval_count  ? 
_diffrn_standards_interval_time   ? 
_diffrn_standards_decay_%         ? 
_diffrn_reflns_number             6104 
_diffrn_reflns_av_R_equivalents   0.0523 
_diffrn_reflns_av_sigmaI/netI     0.0384 
_diffrn_reflns_limit_h_min        -12 
_diffrn_reflns_limit_h_max        12 
_diffrn_reflns_limit_k_min        -7 
_diffrn_reflns_limit_k_max        11 
_diffrn_reflns_limit_l_min        -16 
_diffrn_reflns_limit_l_max        15 
_diffrn_reflns_theta_min          2.97 
_diffrn_reflns_theta_max          26.06 
_reflns_number_total              1272 
_reflns_number_gt                 1032 
_reflns_threshold_expression      >2sigma(I) 
  
_computing_data_collection        'Bruker SMART' 
_computing_cell_refinement        'Bruker SMART' 
_computing_data_reduction         'Bruker SAINT' 
_computing_structure_solution     'SHELXS-97 (Sheldrick, 1990)' 
_computing_structure_refinement   'SHELXL-97 (Sheldrick, 1997)' 
_computing_molecular_graphics     'Bruker SHELXTL' 
_computing_publication_material   'Bruker SHELXTL' 
  
_refine_special_details 
; 
 Refinement of F^2^ against ALL reflections.  The weighted R-factor wR and 
 goodness of fit S are based on F^2^, conventional R-factors R are based 
 on F, with F set to zero for negative F^2^. The threshold expression of 
 F^2^ > 2sigma(F^2^) is used only for calculating R-factors(gt) etc. and is 
 not relevant to the choice of reflections for refinement.  R-factors based 
 on F^2^ are statistically about twice as large as those based on F, and R- 
 factors based on ALL data will be even larger. 
; 
  
_refine_ls_structure_factor_coef  Fsqd 
_refine_ls_matrix_type            full 
_refine_ls_weighting_scheme       calc 
_refine_ls_weighting_details 
 'calc w=1/[\s^2^(Fo^2^)+(0.0311P)^2^+0.0000P] where P=(Fo^2^+2Fc^2^)/3' 
_atom_sites_solution_primary      direct 
_atom_sites_solution_secondary    difmap 
_atom_sites_solution_hydrogens    geom 
_refine_ls_hydrogen_treatment     mixed 
_refine_ls_extinction_method      none 
_refine_ls_extinction_coef        ? 
_refine_ls_number_reflns          1272 
_refine_ls_number_parameters      100 
_refine_ls_number_restraints      0 
_refine_ls_R_factor_all           0.0400 
_refine_ls_R_factor_gt            0.0274 
_refine_ls_wR_factor_ref          0.0630 
_refine_ls_wR_factor_gt           0.0596 
_refine_ls_goodness_of_fit_ref    0.918 
_refine_ls_restrained_S_all       0.918 
_refine_ls_shift/su_max           0.001 
_refine_ls_shift/su_mean          0.000 
  
loop_ 
 _atom_site_label 
 _atom_site_type_symbol 
 _atom_site_fract_x 
 _atom_site_fract_y 
 _atom_site_fract_z 
 _atom_site_U_iso_or_equiv 
 _atom_site_adp_type 
 _atom_site_occupancy 
 _atom_site_symmetry_multiplicity 
 _atom_site_calc_flag 
 _atom_site_refinement_flags 
 _atom_site_disorder_assembly 
 _atom_site_disorder_group 
Zn1 Zn 0.95790(3) 0.20879(4) 0.38013(2) 0.03729(14) Uani 1 1 d . . . 
N9 N 0.9594(2) 0.3499(3) 0.27362(16) 0.0388(6) Uani 1 1 d . . . 
N8 N 0.7735(2) 0.2076(2) 0.43466(16) 0.0381(6) Uani 1 1 d . . . 
C2 C 0.7202(3) 0.2736(3) 0.5083(2) 0.0420(7) Uani 1 1 d . . . 
H2A H 0.7668 0.3361 0.5480 0.050 Uiso 1 1 calc R . . 
C1 C 1.0366(3) 0.4574(3) 0.2526(2) 0.0441(7) Uani 1 1 d . . . 
H1A H 1.1145 0.4814 0.2868 0.053 Uiso 1 1 calc R . . 
N5 N 0.8593(3) 0.3533(3) 0.2080(2) 0.0595(8) Uani 1 1 d . . . 
N4 N 0.8773(3) 0.4584(3) 0.15073(19) 0.0598(8) Uani 1 1 d . . . 
N3 N 0.9903(2) 0.5264(2) 0.17765(17) 0.0384(6) Uani 1 1 d . . . 
N2 N 0.5925(2) 0.2406(3) 0.51941(16) 0.0391(6) Uani 1 1 d . . . 
N1 N 0.5648(3) 0.1499(3) 0.4474(2) 0.0652(8) Uani 1 1 d . . . 
N11 N 0.6731(3) 0.1293(3) 0.39674(19) 0.0657(9) Uani 1 1 d . . . 
  
loop_ 
 _atom_site_aniso_label 
 _atom_site_aniso_U_11 
 _atom_site_aniso_U_22 
 _atom_site_aniso_U_33 
 _atom_site_aniso_U_23 
 _atom_site_aniso_U_13 
 _atom_site_aniso_U_12 
Zn1 0.0319(2) 0.0419(2) 0.0381(2) -0.00101(16) -0.00023(14) 0.00243(14) 
N9 0.0357(13) 0.0382(14) 0.0424(14) 0.0016(12) -0.0033(11) 0.0024(11) 
N8 0.0317(12) 0.0451(15) 0.0374(13) -0.0039(12) 0.0007(10) -0.0007(11) 
C2 0.0347(17) 0.0490(19) 0.0423(16) -0.0098(15) -0.0020(13) -0.0025(14) 
C1 0.0341(15) 0.048(2) 0.0499(18) 0.0038(16) -0.0063(14) -0.0027(15) 
N5 0.0581(17) 0.0556(18) 0.0648(18) 0.0161(15) -0.0210(14) -0.0200(14) 
N4 0.0597(18) 0.0570(18) 0.0625(17) 0.0158(16) -0.0232(14) -0.0186(14) 
N3 0.0339(12) 0.0382(14) 0.0433(14) -0.0001(12) 0.0006(10) -0.0022(11) 
N2 0.0318(13) 0.0476(15) 0.0379(13) -0.0039(12) 0.0022(10) -0.0014(11) 
N1 0.0428(16) 0.085(2) 0.0679(19) -0.0319(18) 0.0106(14) -0.0172(15) 
N11 0.0457(16) 0.084(2) 0.0668(18) -0.0348(16) 0.0111(14) -0.0163(16) 
  
_geom_special_details 
; 
 All esds (except the esd in the dihedral angle between two l.s. planes) 
 are estimated using the full covariance matrix.  The cell esds are taken 
 into account individually in the estimation of esds in distances, angles 
 and torsion angles; correlations between esds in cell parameters are only 
 used when they are defined by crystal symmetry.  An approximate (isotropic) 
 treatment of cell esds is used for estimating esds involving l.s. planes. 
; 
  
loop_ 
 _geom_bond_atom_site_label_1 
 _geom_bond_atom_site_label_2 
 _geom_bond_distance 
 _geom_bond_site_symmetry_2 
 _geom_bond_publ_flag 
Zn1 N8 1.971(2) . ? 
Zn1 N2 1.976(2) 4_556 ? 
Zn1 N3 1.979(2) 3_745 ? 
Zn1 N9 1.987(2) . ? 
N9 C1 1.309(3) . ? 
N9 N5 1.338(3) . ? 
N8 C2 1.302(3) . ? 
N8 N11 1.346(3) . ? 
C2 N2 1.309(3) . ? 
C2 H2A 0.9300 . ? 
C1 N3 1.305(3) . ? 
C1 H1A 0.9300 . ? 
N5 N4 1.287(3) . ? 
N4 N3 1.344(3) . ? 
N3 Zn1 1.979(2) 3_755 ? 
N2 N1 1.342(3) . ? 
N2 Zn1 1.976(2) 4_456 ? 
N1 N11 1.291(3) . ? 
  
loop_ 
 _geom_angle_atom_site_label_1 
 _geom_angle_atom_site_label_2 
 _geom_angle_atom_site_label_3 
 _geom_angle 
 _geom_angle_site_symmetry_1 
 _geom_angle_site_symmetry_3 
 _geom_angle_publ_flag 
N8 Zn1 N2 111.07(9) . 4_556 ? 
N8 Zn1 N3 112.74(9) . 3_745 ? 
N2 Zn1 N3 108.65(10) 4_556 3_745 ? 
N8 Zn1 N9 106.89(9) . . ? 
N2 Zn1 N9 110.05(10) 4_556 . ? 
N3 Zn1 N9 107.37(9) 3_745 . ? 
C1 N9 N5 105.3(2) . . ? 
C1 N9 Zn1 134.1(2) . . ? 
N5 N9 Zn1 120.34(19) . . ? 
C2 N8 N11 105.7(2) . . ? 
C2 N8 Zn1 131.78(19) . . ? 
N11 N8 Zn1 122.56(18) . . ? 
N8 C2 N2 111.4(3) . . ? 
N8 C2 H2A 124.3 . . ? 
N2 C2 H2A 124.3 . . ? 
N3 C1 N9 111.3(3) . . ? 
N3 C1 H1A 124.3 . . ? 
N9 C1 H1A 124.3 . . ? 
N4 N5 N9 109.1(2) . . ? 
N5 N4 N3 108.8(2) . . ? 
C1 N3 N4 105.4(2) . . ? 
C1 N3 Zn1 132.0(2) . 3_755 ? 
N4 N3 Zn1 121.95(19) . 3_755 ? 
C2 N2 N1 105.4(2) . . ? 
C2 N2 Zn1 132.2(2) . 4_456 ? 
N1 N2 Zn1 122.28(18) . 4_456 ? 
N11 N1 N2 109.0(2) . . ? 
N1 N11 N8 108.6(2) . . ? 
  
_diffrn_measured_fraction_theta_max    1.000 
_diffrn_reflns_theta_full              26.06 
_diffrn_measured_fraction_theta_full   1.000 
_refine_diff_density_max    0.347 
_refine_diff_density_min   -0.208 
_refine_diff_density_rms    0.061  
#==================================================
   
data_3 
  
_audit_creation_method            SHELXL-97 
_chemical_name_systematic 
; 
 ? 
; 
_chemical_name_common             ? 
_chemical_melting_point           ? 
_chemical_formula_moiety          ? 
_chemical_formula_sum 
 'C16 H14 N8 Zn' 
_chemical_formula_weight          383.72 
  
loop_ 
 _atom_type_symbol 
 _atom_type_description 
 _atom_type_scat_dispersion_real 
 _atom_type_scat_dispersion_imag 
 _atom_type_scat_source 
 'C'  'C'   0.0033   0.0016 
 'International Tables Vol C Tables 4.2.6.8 and 6.1.1.4' 
 'H'  'H'   0.0000   0.0000 
 'International Tables Vol C Tables 4.2.6.8 and 6.1.1.4' 
 'N'  'N'   0.0061   0.0033 
 'International Tables Vol C Tables 4.2.6.8 and 6.1.1.4' 
 'Zn'  'Zn'   0.2839   1.4301 
 'International Tables Vol C Tables 4.2.6.8 and 6.1.1.4' 
  
_symmetry_cell_setting            Orthorhombic 
_symmetry_space_group_name_H-M    Pbcn 
  
loop_ 
 _symmetry_equiv_pos_as_xyz 
 'x, y, z' 
 '-x+1/2, -y+1/2, z+1/2' 
 '-x, y, -z+1/2' 
 'x+1/2, -y+1/2, -z' 
 '-x, -y, -z' 
 'x-1/2, y-1/2, -z-1/2' 
 'x, -y, z-1/2' 
 '-x-1/2, y-1/2, z' 
  
_cell_length_a                    10.1580(11) 
_cell_length_b                    13.9511(15) 
_cell_length_c                    25.643(3) 
_cell_angle_alpha                 90.00 
_cell_angle_beta                  90.00 
_cell_angle_gamma                 90.00 
_cell_volume                      3634.0(7) 
_cell_formula_units_Z             8 
_cell_measurement_temperature     293(2) 
_cell_measurement_reflns_used     ? 
_cell_measurement_theta_min       ? 
_cell_measurement_theta_max       ? 
  
_exptl_crystal_description        ? 
_exptl_crystal_colour             ? 
_exptl_crystal_size_max           ? 
_exptl_crystal_size_mid           ? 
_exptl_crystal_size_min           ? 
_exptl_crystal_density_meas       ? 
_exptl_crystal_density_diffrn     1.403 
_exptl_crystal_density_method     'not measured' 
_exptl_crystal_F_000              1568 
_exptl_absorpt_coefficient_mu     1.367 
_exptl_absorpt_correction_type    none 
_exptl_absorpt_correction_T_min   ? 
_exptl_absorpt_correction_T_max   ? 
_exptl_absorpt_process_details    ? 
  
_exptl_special_details 
; 
 ? 
; 
  
_diffrn_ambient_temperature       293(2) 
_diffrn_radiation_wavelength      0.71073 
_diffrn_radiation_type            MoK\a 
_diffrn_radiation_source          'fine-focus sealed tube' 
_diffrn_radiation_monochromator   graphite 
_diffrn_measurement_device_type   'CCD area detector' 
_diffrn_measurement_method        'phi and omega scans' 
_diffrn_detector_area_resol_mean  ? 
_diffrn_standards_number          ? 
_diffrn_standards_interval_count  ? 
_diffrn_standards_interval_time   ? 
_diffrn_standards_decay_%         ? 
_diffrn_reflns_number             20841 
_diffrn_reflns_av_R_equivalents   0.2121 
_diffrn_reflns_av_sigmaI/netI     0.3013 
_diffrn_reflns_limit_h_min        -13 
_diffrn_reflns_limit_h_max        13 
_diffrn_reflns_limit_k_min        -18 
_diffrn_reflns_limit_k_max        13 
_diffrn_reflns_limit_l_min        -32 
_diffrn_reflns_limit_l_max        30 
_diffrn_reflns_theta_min          2.48 
_diffrn_reflns_theta_max          28.29 
_reflns_number_total              4359 
_reflns_number_gt                 1198 
_reflns_threshold_expression      >2sigma(I) 
  
_computing_data_collection        'Bruker SMART' 
_computing_cell_refinement        'Bruker SMART' 
_computing_data_reduction         'Bruker SAINT' 
_computing_structure_solution     'SHELXS-97 (Sheldrick, 1990)' 
_computing_structure_refinement   'SHELXL-97 (Sheldrick, 1997)' 
_computing_molecular_graphics     'Bruker SHELXTL' 
_computing_publication_material   'Bruker SHELXTL' 
  
_refine_special_details 
; 
 Refinement of F^2^ against ALL reflections.  The weighted R-factor wR and 
 goodness of fit S are based on F^2^, conventional R-factors R are based 
 on F, with F set to zero for negative F^2^. The threshold expression of 
 F^2^ > 2sigma(F^2^) is used only for calculating R-factors(gt) etc. and is 
 not relevant to the choice of reflections for refinement.  R-factors based 
 on F^2^ are statistically about twice as large as those based on F, and R- 
 factors based on ALL data will be even larger. 
; 
  
_refine_ls_structure_factor_coef  Fsqd 
_refine_ls_matrix_type            full 
_refine_ls_weighting_scheme       calc 
_refine_ls_weighting_details 
 'calc w=1/[\s^2^(Fo^2^)+(0.0198P)^2^+0.0000P] where P=(Fo^2^+2Fc^2^)/3' 
_atom_sites_solution_primary      direct 
_atom_sites_solution_secondary    difmap 
_atom_sites_solution_hydrogens    geom 
_refine_ls_hydrogen_treatment     mixed 
_refine_ls_extinction_method      none 
_refine_ls_extinction_coef        ? 
_refine_ls_number_reflns          4359 
_refine_ls_number_parameters      227 
_refine_ls_number_restraints      0 
_refine_ls_R_factor_all           0.2637 
_refine_ls_R_factor_gt            0.0534 
_refine_ls_wR_factor_ref          0.1072 
_refine_ls_wR_factor_gt           0.0689 
_refine_ls_goodness_of_fit_ref    0.692 
_refine_ls_restrained_S_all       0.692 
_refine_ls_shift/su_max           0.000 
_refine_ls_shift/su_mean          0.000 
  
loop_ 
 _atom_site_label 
 _atom_site_type_symbol 
 _atom_site_fract_x 
 _atom_site_fract_y 
 _atom_site_fract_z 
 _atom_site_U_iso_or_equiv 
 _atom_site_adp_type 
 _atom_site_occupancy 
 _atom_site_symmetry_multiplicity 
 _atom_site_calc_flag 
 _atom_site_refinement_flags 
 _atom_site_disorder_assembly 
 _atom_site_disorder_group 
Zn1 Zn 0.0000 0.02471(7) 0.2500 0.0441(3) Uani 1 2 d S . . 
N8 N -0.1668(4) -0.0428(4) 0.26211(18) 0.0392(14) Uani 1 1 d . . . 
N7 N 0.0311(5) 0.2057(5) 0.3101(2) 0.0496(16) Uani 1 1 d . . . 
N6 N 0.0283(5) 0.1117(5) 0.3106(2) 0.0481(16) Uani 1 1 d . . . 
C16 C -0.2235(5) -0.1232(4) 0.2447(2) 0.0358(14) Uani 1 1 d . . . 
N5 N 0.0649(5) 0.0806(4) 0.3585(3) 0.0578(17) Uani 1 1 d . . . 
N4 N 0.0674(5) 0.2388(4) 0.3569(3) 0.0552(17) Uani 1 1 d . . . 
C15 C 0.0878(6) 0.1601(7) 0.3857(2) 0.0506(17) Uani 1 1 d . . . 
N3 N -0.2580(5) 0.0037(4) 0.29199(18) 0.0439(14) Uani 1 1 d . . . 
C14 C -0.1624(5) -0.1932(5) 0.2103(2) 0.0366(16) Uani 1 1 d . . . 
C13 C -0.1622(5) -0.2891(5) 0.2239(2) 0.0463(19) Uani 1 1 d . . . 
H13A H -0.1961 -0.3082 0.2559 0.056 Uiso 1 1 calc R . . 
C12 C 0.1317(6) 0.1616(7) 0.4398(3) 0.063(2) Uani 1 1 d . . . 
C11 C -0.0617(6) -0.3306(6) 0.1417(3) 0.057(2) Uani 1 1 d . . . 
C10 C -0.1121(6) -0.3563(5) 0.1901(3) 0.0558(19) Uani 1 1 d . . . 
H10A H -0.1118 -0.4205 0.1999 0.067 Uiso 1 1 calc R . . 
C9 C -0.1093(5) -0.1675(6) 0.1630(2) 0.0562(19) Uani 1 1 d . . . 
H9A H -0.1063 -0.1032 0.1535 0.067 Uiso 1 1 calc R . . 
C8 C 0.1745(7) 0.2439(7) 0.4630(3) 0.085(3) Uani 1 1 d . . . 
H8A H 0.1714 0.3009 0.4442 0.102 Uiso 1 1 calc R . . 
C7 C 0.2219(8) 0.2452(9) 0.5128(3) 0.101(4) Uani 1 1 d . . . 
H7B H 0.2533 0.3026 0.5264 0.121 Uiso 1 1 calc R . . 
C6 C 0.2249(8) 0.1663(10) 0.5428(3) 0.097(3) Uani 1 1 d . . . 
C5 C -0.0608(6) -0.2354(6) 0.1298(3) 0.067(2) Uani 1 1 d . . . 
H5B H -0.0260 -0.2160 0.0979 0.080 Uiso 1 1 calc R . . 
C4 C 0.1357(8) 0.0786(7) 0.4687(4) 0.099(3) Uani 1 1 d . . . 
H4B H 0.1089 0.0209 0.4540 0.118 Uiso 1 1 calc R . . 
C3 C 0.2760(7) 0.1647(7) 0.5983(3) 0.145(4) Uani 1 1 d . . . 
H3B H 0.3034 0.2280 0.6082 0.217 Uiso 1 1 calc R . . 
H3C H 0.3496 0.1217 0.6006 0.217 Uiso 1 1 calc R . . 
H3D H 0.2075 0.1434 0.6213 0.217 Uiso 1 1 calc R . . 
C2 C -0.0101(7) -0.4058(5) 0.1045(2) 0.099(3) Uani 1 1 d . . . 
H2A H 0.0214 -0.3754 0.0734 0.149 Uiso 1 1 calc R . . 
H2B H -0.0797 -0.4496 0.0958 0.149 Uiso 1 1 calc R . . 
H2C H 0.0606 -0.4403 0.1208 0.149 Uiso 1 1 calc R . . 
C1 C 0.1801(9) 0.0810(8) 0.5203(4) 0.113(4) Uani 1 1 d . . . 
H1A H 0.1800 0.0250 0.5400 0.136 Uiso 1 1 calc R . . 
N2 N -0.3461(4) -0.1260(3) 0.26312(17) 0.0385(15) Uani 1 1 d . . . 
N1 N -0.3647(5) -0.0468(4) 0.29244(19) 0.0438(14) Uani 1 1 d . . . 
Zn2 Zn -0.5000 -0.20915(7) 0.2500 0.0407(3) Uani 1 2 d S . . 
  
loop_ 
 _atom_site_aniso_label 
 _atom_site_aniso_U_11 
 _atom_site_aniso_U_22 
 _atom_site_aniso_U_33 
 _atom_site_aniso_U_23 
 _atom_site_aniso_U_13 
 _atom_site_aniso_U_12 
Zn1 0.0349(6) 0.0361(7) 0.0615(7) 0.000 -0.0019(7) 0.000 
N8 0.035(3) 0.040(4) 0.042(4) -0.004(3) -0.004(3) -0.002(3) 
N7 0.038(4) 0.057(5) 0.054(4) -0.009(4) 0.003(3) -0.005(3) 
N6 0.045(4) 0.034(4) 0.065(4) -0.009(3) 0.000(3) -0.004(3) 
C16 0.038(3) 0.039(4) 0.030(4) 0.005(4) -0.004(4) 0.002(3) 
N5 0.060(4) 0.047(5) 0.066(5) 0.002(4) -0.009(3) 0.000(3) 
N4 0.049(4) 0.053(5) 0.063(4) 0.007(4) 0.001(3) 0.009(3) 
C15 0.050(4) 0.046(5) 0.055(5) 0.000(5) -0.001(3) 0.001(5) 
N3 0.042(3) 0.035(4) 0.054(4) -0.003(3) -0.003(3) 0.002(3) 
C14 0.027(3) 0.030(5) 0.053(4) -0.006(4) -0.002(3) 0.003(3) 
C13 0.036(4) 0.050(5) 0.053(4) -0.007(4) -0.001(3) 0.012(4) 
C12 0.066(5) 0.066(6) 0.056(5) 0.005(6) -0.009(4) -0.001(5) 
C11 0.056(4) 0.050(5) 0.065(5) -0.007(5) -0.002(4) 0.019(4) 
C10 0.057(4) 0.034(5) 0.076(5) 0.001(4) -0.008(4) 0.003(4) 
C9 0.056(4) 0.052(5) 0.060(5) 0.010(5) 0.012(4) -0.002(4) 
C8 0.107(7) 0.093(9) 0.055(6) -0.003(6) -0.015(5) -0.002(6) 
C7 0.110(8) 0.136(11) 0.057(7) 0.008(8) -0.011(6) -0.023(7) 
C6 0.072(6) 0.150(12) 0.071(7) 0.007(8) -0.017(5) -0.006(8) 
C5 0.070(5) 0.067(6) 0.063(5) 0.003(5) 0.022(4) 0.011(5) 
C4 0.119(7) 0.095(9) 0.081(7) 0.031(6) -0.030(6) -0.019(6) 
C3 0.110(7) 0.249(14) 0.075(6) 0.033(8) -0.035(5) -0.008(8) 
C2 0.134(7) 0.082(6) 0.082(5) -0.019(5) 0.010(6) 0.039(7) 
C1 0.122(8) 0.137(12) 0.079(8) 0.050(7) -0.015(6) -0.009(8) 
N2 0.034(3) 0.039(4) 0.042(4) 0.000(3) 0.006(2) 0.001(2) 
N1 0.036(3) 0.037(4) 0.057(4) -0.002(3) 0.004(3) 0.003(3) 
Zn2 0.0308(5) 0.0418(7) 0.0496(6) 0.000 0.0004(7) 0.000 
  
_geom_special_details 
; 
 All esds (except the esd in the dihedral angle between two l.s. planes) 
 are estimated using the full covariance matrix.  The cell esds are taken 
 into account individually in the estimation of esds in distances, angles 
 and torsion angles; correlations between esds in cell parameters are only 
 used when they are defined by crystal symmetry.  An approximate (isotropic) 
 treatment of cell esds is used for estimating esds involving l.s. planes. 
; 
  
loop_ 
 _geom_bond_atom_site_label_1 
 _geom_bond_atom_site_label_2 
 _geom_bond_distance 
 _geom_bond_site_symmetry_2 
 _geom_bond_publ_flag 
Zn1 N8 1.963(5) . ? 
Zn1 N8 1.963(5) 3 ? 
Zn1 N6 1.993(5) . ? 
Zn1 N6 1.993(5) 3 ? 
N8 C16 1.337(6) . ? 
N8 N3 1.365(6) . ? 
N7 N6 1.311(6) . ? 
N7 N4 1.339(6) . ? 
N7 Zn2 1.970(6) 6_666 ? 
N6 N5 1.353(6) . ? 
C16 N2 1.332(6) . ? 
C16 C14 1.456(7) . ? 
N5 C15 1.331(8) . ? 
N4 C15 1.339(8) . ? 
C15 C12 1.459(8) . ? 
N3 N1 1.293(6) . ? 
C14 C13 1.384(7) . ? 
C14 C9 1.374(7) . ? 
C13 C10 1.374(7) . ? 
C13 H13A 0.9300 . ? 
C12 C4 1.375(10) . ? 
C12 C8 1.363(10) . ? 
C11 C5 1.363(9) . ? 
C11 C10 1.390(8) . ? 
C11 C2 1.511(8) . ? 
C10 H10A 0.9300 . ? 
C9 C5 1.366(8) . ? 
C9 H9A 0.9300 . ? 
C8 C7 1.366(8) . ? 
C8 H8A 0.9300 . ? 
C7 C6 1.343(13) . ? 
C7 H7B 0.9300 . ? 
C6 C1 1.398(12) . ? 
C6 C3 1.516(9) . ? 
C5 H5B 0.9300 . ? 
C4 C1 1.398(9) . ? 
C4 H4B 0.9300 . ? 
C3 H3B 0.9600 . ? 
C3 H3C 0.9600 . ? 
C3 H3D 0.9600 . ? 
C2 H2A 0.9600 . ? 
C2 H2B 0.9600 . ? 
C2 H2C 0.9600 . ? 
C1 H1A 0.9300 . ? 
N2 N1 1.350(6) . ? 
N2 Zn2 1.976(4) . ? 
Zn2 N2 1.976(4) 3_455 ? 
Zn2 N7 1.970(6) 6_556 ? 
Zn2 N7 1.970(6) 8 ? 
  
loop_ 
 _geom_angle_atom_site_label_1 
 _geom_angle_atom_site_label_2 
 _geom_angle_atom_site_label_3 
 _geom_angle 
 _geom_angle_site_symmetry_1 
 _geom_angle_site_symmetry_3 
 _geom_angle_publ_flag 
N8 Zn1 N8 122.7(3) . 3 ? 
N8 Zn1 N6 107.1(2) . . ? 
N8 Zn1 N6 106.9(2) 3 . ? 
N8 Zn1 N6 106.9(2) . 3 ? 
N8 Zn1 N6 107.1(2) 3 3 ? 
N6 Zn1 N6 105.0(4) . 3 ? 
C16 N8 N3 107.1(5) . . ? 
C16 N8 Zn1 136.2(4) . . ? 
N3 N8 Zn1 116.5(4) . . ? 
N6 N7 N4 109.9(6) . . ? 
N6 N7 Zn2 127.5(6) . 6_666 ? 
N4 N7 Zn2 122.5(6) . 6_666 ? 
N7 N6 N5 109.0(5) . . ? 
N7 N6 Zn1 127.1(6) . . ? 
N5 N6 Zn1 123.5(5) . . ? 
N8 C16 N2 108.0(5) . . ? 
N8 C16 C14 125.5(5) . . ? 
N2 C16 C14 126.4(6) . . ? 
C15 N5 N6 104.8(6) . . ? 
N7 N4 C15 104.7(6) . . ? 
N5 C15 N4 111.6(6) . . ? 
N5 C15 C12 124.4(9) . . ? 
N4 C15 C12 124.1(9) . . ? 
N1 N3 N8 108.4(5) . . ? 
C13 C14 C9 118.3(6) . . ? 
C13 C14 C16 119.7(6) . . ? 
C9 C14 C16 121.9(6) . . ? 
C10 C13 C14 120.1(6) . . ? 
C10 C13 H13A 119.9 . . ? 
C14 C13 H13A 119.9 . . ? 
C4 C12 C8 117.7(7) . . ? 
C4 C12 C15 120.7(9) . . ? 
C8 C12 C15 121.6(9) . . ? 
C5 C11 C10 117.0(7) . . ? 
C5 C11 C2 122.2(7) . . ? 
C10 C11 C2 120.8(8) . . ? 
C13 C10 C11 121.6(7) . . ? 
C13 C10 H10A 119.2 . . ? 
C11 C10 H10A 119.2 . . ? 
C5 C9 C14 120.7(7) . . ? 
C5 C9 H9A 119.6 . . ? 
C14 C9 H9A 119.6 . . ? 
C12 C8 C7 122.1(9) . . ? 
C12 C8 H8A 119.0 . . ? 
C7 C8 H8A 119.0 . . ? 
C6 C7 C8 122.2(10) . . ? 
C6 C7 H7B 118.9 . . ? 
C8 C7 H7B 118.9 . . ? 
C7 C6 C1 117.0(9) . . ? 
C7 C6 C3 123.9(11) . . ? 
C1 C6 C3 119.1(11) . . ? 
C9 C5 C11 122.3(7) . . ? 
C9 C5 H5B 118.9 . . ? 
C11 C5 H5B 118.9 . . ? 
C12 C4 C1 119.9(9) . . ? 
C12 C4 H4B 120.0 . . ? 
C1 C4 H4B 120.0 . . ? 
C6 C3 H3B 109.5 . . ? 
C6 C3 H3C 109.5 . . ? 
H3B C3 H3C 109.5 . . ? 
C6 C3 H3D 109.5 . . ? 
H3B C3 H3D 109.5 . . ? 
H3C C3 H3D 109.5 . . ? 
C11 C2 H2A 109.5 . . ? 
C11 C2 H2B 109.5 . . ? 
H2A C2 H2B 109.5 . . ? 
C11 C2 H2C 109.5 . . ? 
H2A C2 H2C 109.5 . . ? 
H2B C2 H2C 109.5 . . ? 
C4 C1 C6 121.1(10) . . ? 
C4 C1 H1A 119.5 . . ? 
C6 C1 H1A 119.5 . . ? 
C16 N2 N1 107.7(5) . . ? 
C16 N2 Zn2 134.2(4) . . ? 
N1 N2 Zn2 117.7(4) . . ? 
N3 N1 N2 108.8(5) . . ? 
N2 Zn2 N2 108.1(3) . 3_455 ? 
N2 Zn2 N7 111.1(2) . 6_556 ? 
N2 Zn2 N7 110.4(2) 3_455 6_556 ? 
N2 Zn2 N7 110.4(2) . 8 ? 
N2 Zn2 N7 111.1(2) 3_455 8 ? 
N7 Zn2 N7 105.8(4) 6_556 8 ? 
  
_diffrn_measured_fraction_theta_max    0.964 
_diffrn_reflns_theta_full              28.29 
_diffrn_measured_fraction_theta_full   0.964 
_refine_diff_density_max    0.614 
_refine_diff_density_min   -0.384 
_refine_diff_density_rms    0.063 
#==============================================END
